# Supplementary material
Source: MDPI journal article supplement (https://www.mdpi.com/2073-4433/12/4/499)
Supplement: s1 [file s1]

**Table S1.** NO<sub>2</sub> performance statistics (MAE, RMSE and  $R^2$  results) for the FFNNs and MLR schemes

|             | NO <sub>2</sub> |             |             |             |             |             |
|-------------|-----------------|-------------|-------------|-------------|-------------|-------------|
|             | FFNN            |             |             | MLR         |             |             |
|             | <i>MAE</i>      | <i>RMSE</i> | $R^2$       | <i>MAE</i>  | <i>RMSE</i> | $R^2$       |
| AGP         | 5.02            | 7.58        | 0.61        | 5.77        | 8.63        | 0.49        |
| ATH         | 3.77            | 5.16        | 0.84        | 4.85        | 6.18        | 0.78        |
| ARI         | 5.02            | 6.76        | 0.88        | 5.82        | 7.66        | 0.84        |
| GEO         | 3.74            | 5.67        | 0.89        | 4.78        | 6.67        | 0.84        |
| ELE         | 5.71            | 8.02        | 0.64        | 6.65        | 9           | 0.55        |
| THR         | 3.64            | 5.81        | 0.59        | 4.32        | 6.59        | 0.47        |
| KOR         | 5.10            | 6.66        | 0.70        | 6.68        | 8.57        | 0.50        |
| LIO         | 5.31            | 7.78        | 0.80        | 6           | 8.61        | 0.75        |
| LYK         | 4.14            | 5.89        | 0.87        | 4.81        | 6.89        | 0.82        |
| MAR         | 5.32            | 8.02        | 0.87        | 6.07        | 8.98        | 0.84        |
| SMY         | 6.52            | 9.94        | 0.82        | 8.74        | 11.83       | 0.74        |
| PAT         | 10.72           | 15.24       | 0.69        | 14.88       | 19.56       | 0.49        |
| PIR         | 11.05           | 15.05       | 0.64        | 14.92       | 18.96       | 0.43        |
| PER         | 6.20            | 8.80        | 0.84        | 6.99        | 10.03       | 0.80        |
| <b>MEAN</b> | <b>5.80</b>     | <b>8.31</b> | <b>0.76</b> | <b>7.23</b> | <b>9.87</b> | <b>0.67</b> |

**Table S2.** O<sub>3</sub> performance statistics (MAE, RMSE and  $R^2$  results) for the FFNNs and MLR schemes

|             | O <sub>3</sub> |             |             |             |              |             |
|-------------|----------------|-------------|-------------|-------------|--------------|-------------|
|             | FFNN           |             |             | MLR         |              |             |
|             | <i>MAE</i>     | <i>RMSE</i> | $R^2$       | <i>MAE</i>  | <i>RMSE</i>  | $R^2$       |
| AGP         | 8.73           | 12.32       | 0.76        | 10.86       | 14.65        | 0.66        |
| ATH         | 5.49           | 7.49        | 0.92        | 7.42        | 9.85         | 0.86        |
| GEO         | 5.11           | 7.02        | 0.95        | 6.73        | 8.93         | 0.92        |
| ELE         | 7.55           | 11.60       | 0.87        | 10.84       | 14.42        | 0.79        |
| THR         | 8.10           | 10.73       | 0.80        | 10.72       | 13.85        | 0.66        |
| KOR         | 8.12           | 11.98       | 0.80        | 13.45       | 16.97        | 0.60        |
| LIO         | 6.70           | 9.08        | 0.92        | 7.87        | 10.83        | 0.88        |
| LYK         | 6.61           | 9.63        | 0.92        | 7.84        | 11.36        | 0.89        |
| MAR         | 5.94           | 8.53        | 0.94        | 7.19        | 10.27        | 0.92        |
| SMY         | 7.02           | 11.23       | 0.91        | 10.49       | 13.81        | 0.86        |
| PAT         | 7.71           | 11.08       | 0.72        | 11.41       | 15.53        | 0.44        |
| PIR         | 5.32           | 7.48        | 0.83        | 8.33        | 10.95        | 0.63        |
| PER         | 6.78           | 8.98        | 0.93        | 8.06        | 11           | 0.90        |
| <b>MEAN</b> | <b>6.86</b>    | <b>9.78</b> | <b>0.87</b> | <b>9.32</b> | <b>12.49</b> | <b>0.77</b> |

**Table S3.** PM<sub>10</sub> performance statistics (MAE, RMSE and  $R^2$  results) for the FFNNs and MLR schemes

|             | PM <sub>10</sub> |              |             |             |              |             |
|-------------|------------------|--------------|-------------|-------------|--------------|-------------|
|             | FFNN             |              |             | MLR         |              |             |
|             | MAE              | RMSE         | $R^2$       | MAE         | RMSE         | $R^2$       |
| AGP         | 4.33             | 6.14         | 0.96        | 5.96        | 8.64         | 0.93        |
| ARI         | 6.07             | 16.65        | 0.84        | 7.42        | 12.22        | 0.90        |
| ELE         | 5.15             | 8.72         | 0.91        | 7.05        | 10.88        | 0.86        |
| THR         | 5.22             | 10.12        | 0.88        | 6.11        | 9.74         | 0.89        |
| KOR         | 5.65             | 11.33        | 0.87        | 7.43        | 11.76        | 0.85        |
| LIO         | 7.11             | 17.05        | 0.83        | 8.69        | 15.01        | 0.86        |
| LYK         | 4.86             | 9.60         | 0.93        | 5.47        | 10.32        | 0.92        |
| MAR         | 4.76             | 7.94         | 0.95        | 5.47        | 9.74         | 0.93        |
| SMY         | 5.17             | 9.59         | 0.89        | 6.82        | 11.10        | 0.85        |
| PIR         | 8.04             | 17.34        | 0.71        | 11.83       | 18.16        | 0.68        |
| PER         | 6.45             | 12.54        | 0.88        | 6.67        | 10.58        | 0.92        |
| <b>MEAN</b> | <b>5.71</b>      | <b>11.55</b> | <b>0.88</b> | <b>7.17</b> | <b>11.65</b> | <b>0.87</b> |

**Table S4.** PM<sub>2.5</sub> performance statistics (MAE, RMSE and  $R^2$  results) for the FFNNs and MLR schemes

|             | PM <sub>2.5</sub> |             |             |             |             |             |
|-------------|-------------------|-------------|-------------|-------------|-------------|-------------|
|             | FFNN              |             |             | MLR         |             |             |
|             | MAE               | RMSE        | $R^2$       | MAE         | RMSE        | $R^2$       |
| AGP         | 3.49              | 4.92        | 0.74        | 3.94        | 5.66        | 0.65        |
| ARI         | 6.06              | 10.23       | 0.75        | 6.48        | 10.52       | 0.73        |
| ELE         | 5.33              | 8.35        | 0.59        | 5.83        | 8.98        | 0.53        |
| THR         | 3.88              | 5.64        | 0.68        | 4.19        | 5.99        | 0.64        |
| LYK         | 5.03              | 9.54        | 0.66        | 5.55        | 9.86        | 0.64        |
| PIR         | 7.23              | 12.16       | 0.71        | 8.06        | 12.80       | 0.68        |
| <b>MEAN</b> | <b>5.17</b>       | <b>8.47</b> | <b>0.69</b> | <b>5.68</b> | <b>8.97</b> | <b>0.65</b> |

**Table S5.** SO<sub>2</sub> performance statistics (MAE, RMSE and  $R^2$  results) for the FFNNs and MLR schemes

|             | SO <sub>2</sub> |             |             |             |             |             |
|-------------|-----------------|-------------|-------------|-------------|-------------|-------------|
|             | FFNN            |             |             | MLR         |             |             |
|             | MAE             | RMSE        | $R^2$       | MAE         | RMSE        | $R^2$       |
| ATH         | 1.62            | 2.53        | 0.72        | 1.83        | 2.82        | 0.65        |
| ARI         | 1.33            | 2.17        | 0.79        | 1.61        | 2.50        | 0.71        |
| ELE         | 2.97            | 7           | 0.39        | 3.73        | 7.49        | 0.25        |
| KOR         | 0.88            | 1.31        | 0.38        | 1.04        | 1.49        | 0.20        |
| PAT         | 1.65            | 2.45        | 0.58        | 2.16        | 3.15        | 0.29        |
| PIR         | 2.88            | 4.29        | 0.43        | 3.94        | 4.96        | 0.24        |
| <b>MEAN</b> | <b>1.89</b>     | <b>3.29</b> | <b>0.55</b> | <b>2.39</b> | <b>3.74</b> | <b>0.39</b> |
